# Supplementary material for: Investigation of the mechanism of metal–organic frameworks preventing polysulfide shuttling from the perspective of composition and structure
Source: Royal Society of Chemistry journal article supplement (doi:10.1039/d0ta00533a), 2020-01-01
Supplement: d0ta00533a2.pdf [file d0ta00533a2.pdf]

**Investigation of the Mechanism of Metal-organic Frameworks in Preventing  
Polysulfides Shuttling - From the Perspective of Composition and Structure**

Jing Han<sup>ab</sup>, Shu Gao<sup>c</sup>, Ruxing Wang<sup>a</sup>, Kangli Wang<sup>a\*</sup>, Mao Jiang<sup>b</sup>, Jie Yan<sup>b</sup>, Qianzheng  
Jin<sup>b</sup> and Kai Jiang<sup>a\*</sup>

<sup>a</sup>State Key Laboratory of Advanced Electromagnetic Engineering and Technology,  
School of Electrical and Electronic Engineering, Huazhong University of Science  
and Technology, Wuhan, Hubei 430074, China

<sup>b</sup>State Key Laboratory of Materials Processing and Die & Mould Technology, School  
of Materials Science and Engineering, Huazhong University of Science and  
Technology, Wuhan, Hubei 430074, China

<sup>c</sup>School of Physics and Information Engineering & Key Laboratory of Optoelectronic  
Chemical Materials and Devices of Ministry of Education, Jiangnan University,  
Wuhan 430056, China

Figure S1

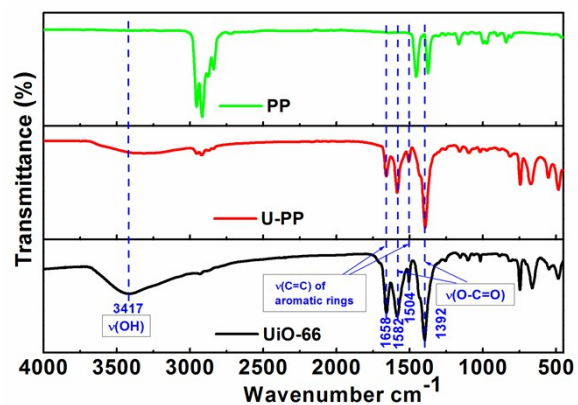

Figure S1. The Fourier transform infrared (FTIR) spectra of UiO-66, pristine PP membrane and U-PP membrane.

Figure S2

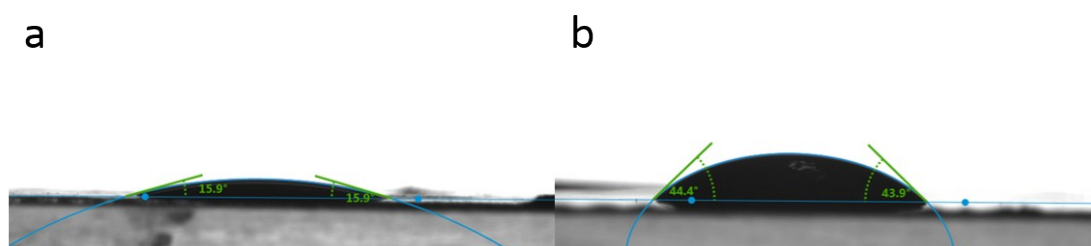

Figure S2. Contact angle of (a) U-PP and (b) PP membrane with electrolyte.

Figure S3

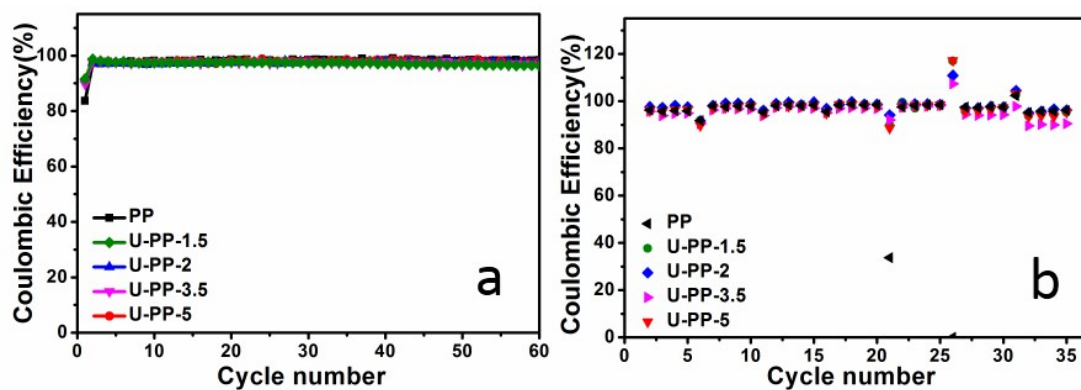

Figure S3. Coulombic efficiency of (a) cycle and (b) rate tests for LSBs with pristine PP separator and U-PP separators with different thickness of UiO-66 layer.

Figure S4

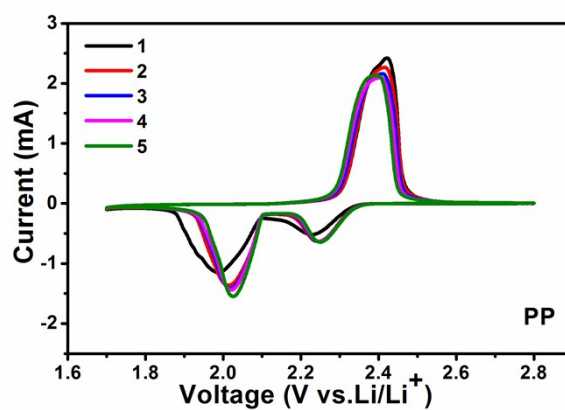

Figure S4. CV curves of the LSB with PP separator at different cycles.

Figure S5

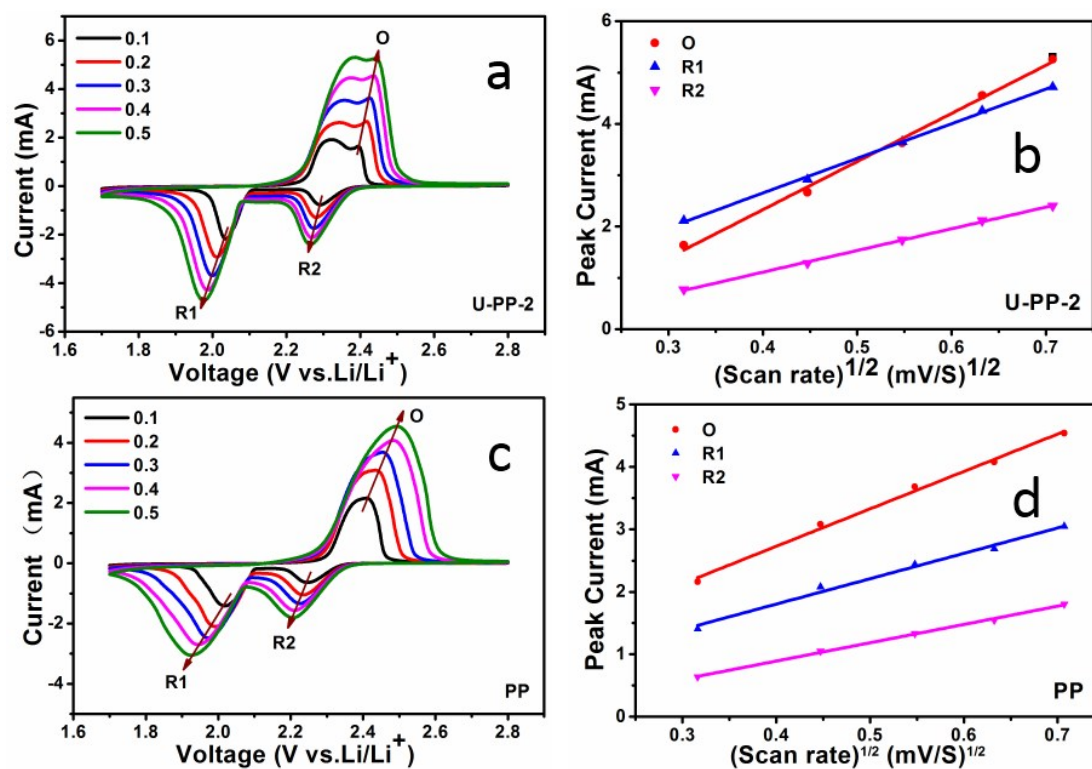

Figure S5. CV curves with different scan rates (a, c) and the linear fits of  $I_p$  vs.  $v^{1/2}$  of the LSBs with U-PP-2 and PP separators (b, d).

Figure S6

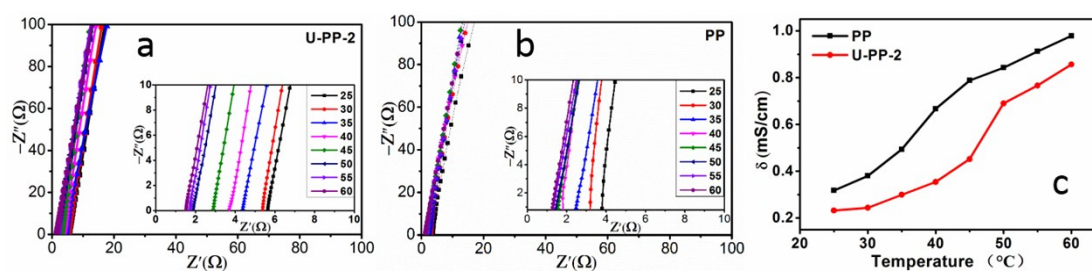

Figure S6. The EIS (a, b), and the lithium ion conductivity (c) of blocking cells composed of stainless steel (SS)/membrane/SS with U-PP-2 and PP separators at 25 to 60 °C.

Figure S7

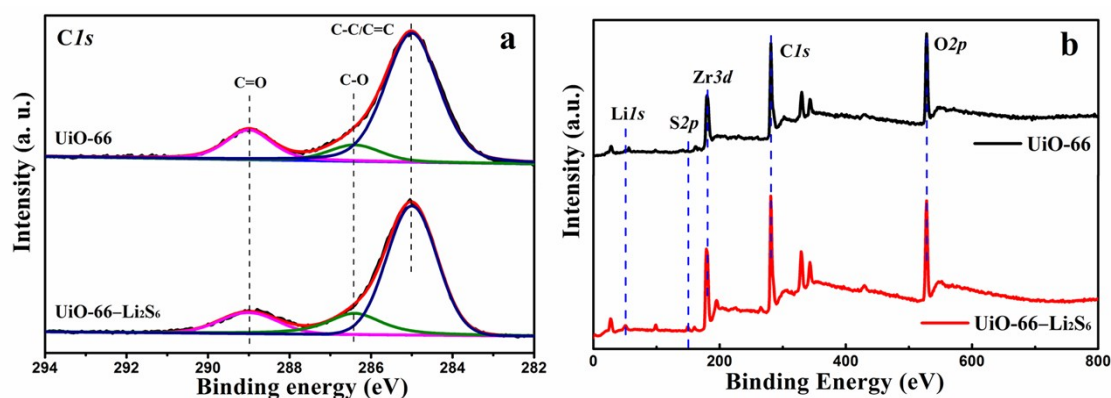

Figure S7. Comparison of (a) high-resolution XPS spectra of C *1s*, and (b) full spectra of UiO-66 before and after adsorption.

Table S1. Li<sup>+</sup> diffusion coefficient for different peaks for the batteries with U-PP-2 and PP separators. ( $10^{-10}$  cm<sup>2</sup>/S)

|        | $D$ (O) | $D$ (R1) | $D$ (R2) |
|--------|---------|----------|----------|
| U-PP-2 | 13.48   | 6.99     | 2.74     |
| PP     | 5.50    | 2.53     | 1.31     |

Table S2. Sulfur contents on the surface of Li anode of the LSBs with different separators after 1 and 100 cycles according to the EDS mapping.

| Element | PP 1st   |          | U-PP-2 1st |          | PP 100th |          | U-PP-2 100th |          |
|---------|----------|----------|------------|----------|----------|----------|--------------|----------|
|         | Weight % | Atomic % | Weight %   | Atomic % | Weight % | Atomic % | Weight %     | Atomic % |
| C K     | 5.68     | 7.72     | 3.31       | 4.58     | 6.26     | 10.83    | 9.76         | 13.42    |
| O K     | 81.68    | 83.29    | 78.36      | 81.41    | 37.52    | 48.75    | 72.3         | 74.64    |
| F K     | 7.3      | 6.27     | 12.83      | 11.23    | 8.9      | 9.74     | 8.31         | 7.23     |
| S K     | 5.34     | 2.72     | 5.3        | 2.75     | 47.33    | 30.69    | 8.88         | 4.58     |
| Zr K    |          |          | 0.2        | 0.04     |          |          | 0.75         | 0.14     |

Table S3. Ionic conductivity comparison of the MOFs containing composite separators.

| MOF-based membranes                                    | Thickness ( $\mu\text{m}$ ) | Ionic conductivity ( $\text{mS cm}^{-1}$ ) | $R_0$ ( $\Omega$ ) | S loading ( $\text{mg cm}^{-2}$ ) | Ref       |
|--------------------------------------------------------|-----------------------------|--------------------------------------------|--------------------|-----------------------------------|-----------|
| UiO-66-NH <sub>2</sub> @SiO <sub>2</sub> /Celgard 2320 | 55-60                       | ~0.1                                       | ~4.5               | 0.5                               |           |
| HKUST-Cu/GO                                            | 22                          | 0.072                                      |                    | 0.3                               |           |
| Ce-MOF-808/CNT)/Celgard                                | 33                          |                                            |                    | 2.5-6                             |           |
| HKUST-Zn/GO                                            | 18                          |                                            |                    | 0.6-0.8                           |           |
| Cu <sub>2</sub> (CuTCPP)/Celgard                       | 25.5                        |                                            | 8                  | 2                                 |           |
| HKUST-Cu@PVDF-HFP                                      | 28                          | 0.094/0.138                                | 9/4.7              | 1-1.5                             |           |
| PSS@HKUST-1/Celgard                                    | 29.2                        | 0.015                                      |                    | 1.3-4.3-11.27                     |           |
| Prussian blue@Celgard                                  | 29.1                        | 0.132                                      | 2.9-3.4            |                                   |           |
| UiO-66@Celgard                                         | 27                          | 0.232                                      | 2.13               | 2.5-3                             | This work |
